# Supplementary material for: Establishment and verification of a prognostic model based on coagulation and fibrinolysis-related genes in hepatocellular carcinoma
Source: publisher site journal article supplement (doi:10.18632/aging.205699), 2024-04-01
Supplement: Supplementary file [file aging-v16-205699-supplementary-material-SD1.pdf]

## SUPPLEMENTARY FIGURES

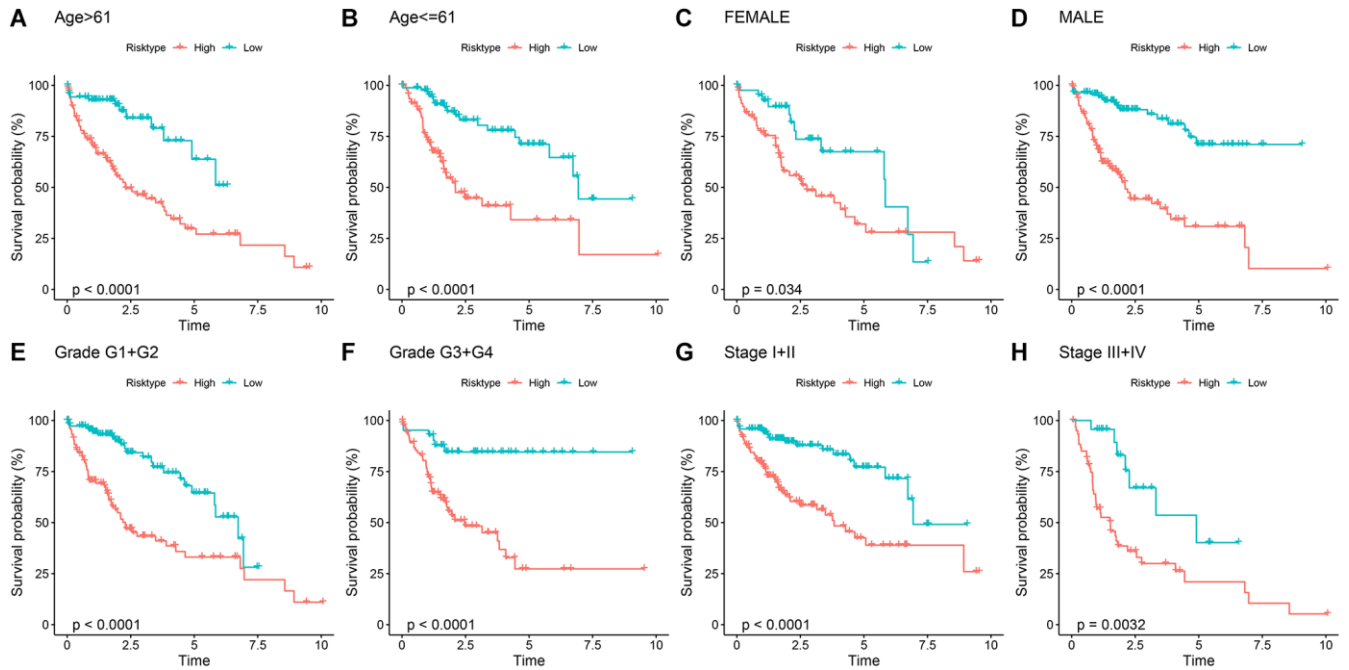

**Supplementary Figure 1.** Survival state between different RiskScore groups across clinicopathological features (A–H) of TCGA-HCC cohort.

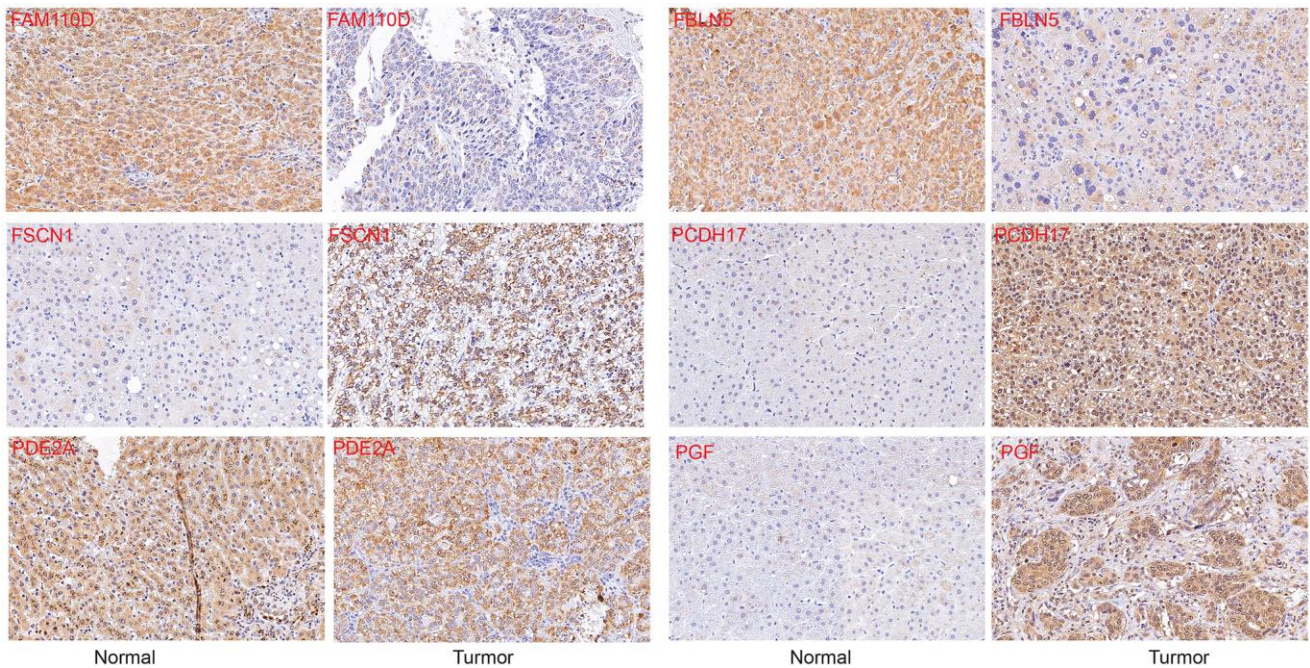

**Supplementary Figure 2.** Immunohistochemistry validation of key genes.
